# Supplementary material for: Surgical Management of Craniovertebral Junction Schwannomas: A Systematic Review
Source: MDPI journal article supplement (doi:10.3390/curroncol29070384), 2022-07-09
Supplement: s1 [file s1]

Supplementary File S1. Overview of all included studies.

| Authors – Year                         | Study Design – Level of Evidence | Patients No./ Male | Age years median (range) | Cranial Nerve Deficits at Presentation No. patients (percentage) | Tumor Origin No. patients (percentage) | Laterality No. patients (percentage) | Location No. patients (percentage) | Tumor Type No. patients (percentage) | Surgical Approach No. patients (percentage) | Extent of Resection No. patients (percentage) | Complications No. patients (percentage) | Stereotactic Radiosurgery No. patients (percentage) | Symptom Improvement No. patients (percentage) | Post-Operative Cranial Nerve Deficits No. patients (percentage) | Recurrence No. patients (percentage) | PFS months median (range) | OS months median (range) | Status No. patients (percentage) |
|----------------------------------------|----------------------------------|--------------------|--------------------------|------------------------------------------------------------------|----------------------------------------|--------------------------------------|------------------------------------|--------------------------------------|---------------------------------------------|-----------------------------------------------|-----------------------------------------|-----------------------------------------------------|-----------------------------------------------|-----------------------------------------------------------------|--------------------------------------|---------------------------|--------------------------|----------------------------------|
| Scott et al. – 1949 <sup>1</sup>       | Case report – V                  | 1 / 0 (0%)         | 50                       | IX, X, XI, XII                                                   | IX-X-XI                                | R                                    | JF & HC                            | I, ID                                | SC + CL (C1-C3)                             | PTR                                           | 0 (0%)                                  | 0 (0%)                                              | 1 (100%)                                      | IX, X, XI, XII                                                  | 0 (0%)                               |                           | 36.0                     | 1 Alive (100%)                   |
| Morelli et al. – 1966 <sup>2</sup>     | Case report – V                  | 1 / 0 (0%)         | 22                       | XII                                                              | XII                                    | R                                    | HC                                 | I, ID                                | SC + CL (C1)                                | GTR                                           | 0 (0%)                                  | 0 (0%)                                              | 0 (0%)                                        | XII                                                             | 0 (0%)                               |                           | 0.1                      | 1 Dead (100%)                    |
| Strang et al. – 1967 <sup>3</sup>      | Case report – V                  | 1 / 0 (0%)         | 51                       | IX, X, XI, XII                                                   | XII                                    | R                                    | HC                                 | I-E, ID-ED                           | SC + CL (C1)                                | GTR                                           | 0 (0%)                                  | 0 (0%)                                              | 1 (100%)                                      | XII                                                             | 0 (0%)                               |                           | 3.0                      | 1 Alive (100%)                   |
| Bartal et al. – 1973 <sup>4</sup>      | Case report – V                  | 1 / 1 (100%)       | 36                       | X, XI, XII                                                       | XII                                    | L                                    | HC                                 | I-E, ID-ED                           | SC                                          | PTR                                           | Hydrocephalus                           | 0 (0%)                                              | 1 (100%)                                      | XII                                                             | 0 (0%)                               |                           | 12.0                     | 1 Alive (100%)                   |
| Sumra et al. – 1978 <sup>5</sup>       | Case report – V                  | 1 / 1 (100%)       | 46                       | 0 (0%)                                                           | C2                                     | R                                    | C1-C2 F                            | E, ID-ED                             | CL (C2)                                     | GTR                                           | 0 (0%)                                  | 0 (0%)                                              | 1 (100%)                                      | 0 (0%)                                                          | 0 (0%)                               |                           | 1.0                      | 1 Alive (100%)                   |
| Conrad et al. – 1979 <sup>6</sup>      | Case report – V                  | 1 / 0 (0%)         | 46                       | 0 (0%)                                                           | C2                                     | L                                    | C1-C2 F                            | E, ID                                | CL (C2)                                     | GTR                                           | 0 (0%)                                  | 0 (0%)                                              | 1 (100%)                                      | 0 (0%)                                                          | 0 (0%)                               |                           | 1.0                      | 1 Alive (100%)                   |
| Fujiwara et al. – 1980 <sup>7</sup>    | Case report – V                  | 1 / 0 (0%)         | 45                       | XII                                                              | XII                                    | R                                    | HC                                 | I, ID                                | SC                                          | GTR                                           | 0 (0%)                                  | 0 (0%)                                              | 1 (100%)                                      | XII                                                             | 0 (0%)                               |                           | 3.0                      | 1 Alive (100%)                   |
| Ulse et al. – 1981 <sup>8</sup>        | Case report – V                  | 1 / 0 (0%)         | 28                       | V, VII, IX, X, XI, XII                                           | XII                                    | L                                    | FM                                 | I, ID                                | SC                                          | GTR                                           | 0 (0%)                                  | 0 (0%)                                              | 1 (100%)                                      | XII                                                             | 0 (0%)                               |                           | 4.0                      | 1 Alive (100%)                   |
| Berger et al. – 1982 <sup>9</sup>      | Case report – V                  | 1 / 0 (0%)         | 17                       | XII                                                              | XII                                    | R                                    | HC                                 | I, ID                                | SC                                          | GTR                                           | 0 (0%)                                  | 0 (0%)                                              | 1 (100%)                                      | XII                                                             | 0 (0%)                               |                           | 3.0                      | 1 Alive (100%)                   |
| Dolan et al. – 1982 <sup>10</sup>      | Case report – V                  | 1 / 0 (0%)         | 24                       | VII, IX, X, XI, XII                                              | XII                                    | L                                    | HC                                 | I-E, ID                              | SC                                          | PTR                                           | CSF leak                                | 0 (0%)                                              | 1 (100%)                                      | IX, X, XII                                                      | 0 (0%)                               |                           | 3.0                      | 1 Alive (100%)                   |
| Hakuba et al. – 1984 <sup>11</sup>     | Case series – IV                 | 2 / 1 (50%)        | 55                       | 0 (0%)                                                           | 2 C2 (100%)                            | 1 L (50%)<br>1 R (50%)               | 2 C1-C3 F (100%)                   | 2 I-E, ID-ED (100%)                  | 2 CL (C2)                                   | 2 PTR (100%)                                  | 0 (0%)                                  | 0 (0%)                                              | 2 (100%)                                      | 0 (0%)                                                          | 0 (0%)                               |                           | 21.0 (12-30)             | 2 Alive (100%)                   |
| Tuck et al. – 1984 <sup>12</sup>       | Case series – IV                 | 2 / 0 (0%)         | 57 (52-62)               | 1 XI, XII (50%)<br>1 VIII, IX, X, XII (50%)                      | 2 XII (100%)                           | 1 L (50%)<br>1 R (50%)               | 2 HC (100%)                        | 1 I, ID (50%)<br>1 I-E, ID-ED (50%)  | 2 SC (100%)                                 | 1 PTR (50%)<br>1 GTR (50%)                    | 0 (0%)                                  | 0 (0%)                                              | 2 (100%)                                      | 1 XI, XII (50%)<br>1 XII (50%)                                  | 1 (50%)                              | 36.0                      | 30.0 (12-48)             | 2 Alive (100%)                   |
| Bettoni et al. – 1985 <sup>13</sup>    | Case report – V                  | 1 / 0 (0%)         | 62                       | VII, XII                                                         | XII                                    | L                                    | HC                                 | I, ED                                | SC                                          | GTR                                           | 0 (0%)                                  | 0 (0%)                                              | 1 (100%)                                      | XII                                                             | 0 (0%)                               |                           | 24.0                     | 1 Alive (100%)                   |
| Lesoin et al. – 1986 <sup>14</sup>     | Case report – V                  | 1 / 1 (100%)       | 55                       | 0 (0%)                                                           | C2                                     | R                                    | C1-C3 F                            | E, ED                                | CL (C2-C3)                                  | PTR                                           | C2 anesthesia                           | 0 (0%)                                              | 1 (100%)                                      | 0 (0%)                                                          | 0 (0%)                               |                           | 3.0                      | 1 Alive (100%)                   |
| Shearman et al. – 1986 <sup>15</sup>   | Case report – V                  | 1 / 1 (100%)       | 4                        | XI, XII                                                          | XII                                    | L                                    | JF                                 | I-E, ED                              | SC                                          | GTR                                           | 0 (0%)                                  | 0 (0%)                                              | 1 (100%)                                      | XI, XII                                                         | 1 (100%)                             | 8.0                       | 12.0                     | 1 Alive (100%)                   |
| Solymosi et al. – 1987 <sup>16</sup>   | Case report – V                  | 1 / 1 (100%)       | 48                       | VIII, IX, X, XII                                                 | XII                                    | L                                    | JF                                 | I, ID-ED                             | SC                                          | GTR                                           | 0 (0%)                                  | 0 (0%)                                              | 1 (100%)                                      | XII                                                             | 0 (0%)                               |                           | 3.0                      | 1 Alive (100%)                   |
| Nakashima et al. – 1988 <sup>17</sup>  | Case report – V                  | 1 / 1 (100%)       | 67                       | VIII, IX, X, XI, XII                                             | XI                                     | R                                    | JF                                 | I, ID-ED                             | SC-RS                                       | PTR                                           | 0 (0%)                                  | 0 (0%)                                              | 1 (100%)                                      | IX, X                                                           | 0 (0%)                               |                           | 10.0                     | 1 Alive (100%)                   |
| Crockard et al. – 1991 <sup>18</sup>   | Case series – IV                 | 2 / 2 (100%)       | 39 (32-46)               | 0 (0%)                                                           | 2 C1 (100%)                            | 2 R (100%)                           | 2 FM (100%)                        | 2 I-E, ID (100%)                     | 2 Transoral (100%)                          | 2 GTR (100%)                                  | 2 Dysphagia (100%)                      | 0 (0%)                                              | 1 (100%)                                      | 0 (0%)                                                          | 0 (0%)                               |                           | 54.0 (36-72)             | 2 Alive (100%)                   |
| Kratimenos et al. – 1993 <sup>19</sup> | Case series – IV                 | 4 / 1 (25%)        | 30.5 (24-34)             | 0 (0%)                                                           | 4 C1 (100%)                            | 3 L (75%)<br>1 R (25%)               | 2 C1-C2 F (50%)<br>1 FM (25%)      | 4 E, ID-ED (100%)                    | 4 FL (100%)                                 | 4 GTR (100%)                                  | 0 (0%)                                  | 0 (0%)                                              | 4 (100%)                                      | 0 (0%)                                                          | 0 (0%)                               |                           | 3.0                      | 4 Alive (100%)                   |

|                                           |                  |                 |                 |                                                                                  |                                   |                                  | 1 FM-C1<br>(25%)                 |                         |                                             |                               |                         |          |          |                                                                             |          |                |                             |                   |
|-------------------------------------------|------------------|-----------------|-----------------|----------------------------------------------------------------------------------|-----------------------------------|----------------------------------|----------------------------------|-------------------------|---------------------------------------------|-------------------------------|-------------------------|----------|----------|-----------------------------------------------------------------------------|----------|----------------|-----------------------------|-------------------|
| Krauss et al. – 1993 <sup>20</sup>        | Case report – V  | 1 /<br>0 (0%)   | 49              | V, VII, IX, X, XII                                                               | XII                               | R                                | HC                               | I, ID                   | SC-TC                                       | PTR                           | Dysphagia,<br>pneumonia | 0 (0%)   | 1 (100%) | IX, X                                                                       | 1 (100%) | 2.0            | 3.0                         | 1 Dead<br>(100%)  |
| Kamitani et al. – 1994 <sup>21</sup>      | Case series – IV | 2 /<br>1 (50%)  | 50.5<br>(48-53) | 1 VII, VIII (50%)<br>1 XII (50%)                                                 | 1 IX-X-XI<br>(50%)<br>1 XII (50%) | 2 L (100%)                       | 1 JF (50%)<br>1 JF & HC<br>(50%) | 2 I-E, ID-ED<br>(100%)  | 1 SC (50%)<br>1 SC + CL<br>(C1-C2)<br>(50%) | 1 PTR (50%)<br>1 GTR<br>(50%) | 1 Hemiplegia<br>(50%)   | 0 (0%)   | 1 (50%)  | 1 VII, VIII<br>(50%)<br>1 IX, X, XI, XII<br>(50%)                           | 1 (50%)  | 24.0           | 14.5<br>(3-26)              | 2 Alive<br>(100%) |
| Okura et al. – 1994 <sup>22</sup>         | Case report – V  | 1 /<br>0 (0%)   | 59              | XII                                                                              | XII                               | R                                | HC                               | I-E, ID-ED              | SC                                          | GTR                           | 0 (0%)                  | 0 (0%)   | 1 (100%) | XI, XII                                                                     | 0 (0%)   | 2.0            | 6 Alive<br>(30%)            |                   |
| Smith et al. – 1995 <sup>23</sup>         | Case report – V  | 1 /<br>1 (100%) | 47              | IX, X, XII                                                                       | XII                               | L                                | HC                               | I-E, ID-ED              | TC                                          | GTR                           | 0 (0%)                  | 0 (0%)   | 1 (100%) | IX, X, XII                                                                  | 0 (0%)   | 3.0            | 1 Alive<br>(100%)           |                   |
| Kobayashi et al. – 1996 <sup>24</sup>     | Case report – V  | 1 /<br>0 (0%)   | 46              | 0 (0%)                                                                           | XII                               | R                                | HC                               | I, ID                   | SC                                          | GTR                           | CSF leak                | 0 (0%)   | 1 (100%) | IX, X, XI, XII                                                              | 0 (0%)   | 3.0            | 1 Alive<br>(100%)           |                   |
| Sato et al. – 1996 <sup>25</sup>          | Case report – V  | 1 /<br>0 (0%)   | 59              | XII                                                                              | XII                               | R                                | HC                               | I-E, ID-ED              | SC-TC + CL<br>(C1)                          | PTR                           | CSF leak                | 0 (0%)   | 1 (100%) | XII                                                                         | 0 (0%)   | 1.0            | 1 Alive<br>(100%)           |                   |
| Sairyo et al. – 1997 <sup>26</sup>        | Case report – V  | 1 /<br>1 (100%) | 64              | 0 (0%)                                                                           | C2                                | R                                | C1-C2 F                          | E, ED                   | CL (C1)                                     | GTR                           | 0 (0%)                  | 0 (0%)   | 1 (100%) | 0 (0%)                                                                      | 0 (0%)   | 3.0            | 1 Alive<br>(100%)           |                   |
| Bunc et al. – 1998 <sup>27</sup>          | Case report – V  | 1 /<br>1 (100%) | 53              | IX, X, XII                                                                       | XII                               | R                                | HC                               | I-E, ID-ED              | SC-TC                                       | GTR                           | Dysphagia               | 0 (0%)   | 1 (100%) | IX, X, XI, XII                                                              | 0 (0%)   | 12.0           | 1 Alive<br>(100%)           |                   |
| Gilsbach et al. – 1998 <sup>28</sup>      | Case report – V  | 1 /<br>1 (100%) | 48              | IX, XII                                                                          | XII                               | R                                | JF & HC                          | I, ID                   | SC                                          | GTR                           | 0 (0%)                  | 0 (0%)   | 1 (100%) | IX, XI, XII                                                                 | 0 (0%)   | 12.0           | 1 Alive<br>(100%)           |                   |
| Spinnato et al. – 1998 <sup>29</sup>      | Case report – V  | 1 /<br>0 (0%)   | 49              | 0 (0%)                                                                           | XII                               | R                                | FM & HC                          | I-E, ID-ED              | SC-TC + CL<br>(C1-C2)                       | GTR                           | 0 (0%)                  | 0 (0%)   | 1 (100%) | 0 (0%)                                                                      | 0 (0%)   | 3.0            | 1 Alive<br>(100%)           |                   |
| Kachhara et al. – 1999 <sup>30</sup>      | Case report – V  | 1 /<br>1 (100%) | 24              | XII                                                                              | XII                               | R                                | HC                               | I-E, ID-ED              | SC                                          | PTR                           | 0 (0%)                  | 0 (0%)   | 1 (100%) | XII                                                                         | 0 (0%)   | 3.0            | 1 Alive<br>(100%)           |                   |
| Hoshi et al. – 2000 <sup>31</sup>         | Case series – IV | 2 /<br>2 (100%) | 55.5<br>(48-63) | 1 IX, XII (50%)<br>1 VII, IX, X, XI,<br>XII (50%)                                | 2 XII (100%)                      | 2 R (100%)                       | 2 HC<br>(100%)                   | 2 I-E, ID-ED<br>(100%)  | 2 SC (100%)                                 | 1 PTR (50%)<br>1 GTR<br>(50%) | 1 SAH (50%)             | 0 (0%)   | 2 (100%) | 1 XII (50%)<br>1 IX, X (50%)                                                | 0 (0%)   | 1<br>(0.1-2)   | 1 Alive,<br>1 Dead<br>(50%) |                   |
| Kalavakonda et al. – 2000 <sup>32</sup>   | Case report – V  | 1 /<br>1 (100%) | 52              | 0 (0%)                                                                           | C1                                | L                                | FM-C1                            | E, ED                   | TC                                          | GTR                           | 0 (0%)                  | 0 (0%)   | 1 (100%) | 0 (0%)                                                                      | 0 (0%)   | 3.0            | 1 Alive<br>(100%)           |                   |
| Mariniello et al. – 2000 <sup>33</sup>    | Case report – V  | 1 /<br>0 (0%)   | 20              | 0 (0%)                                                                           | XII                               | R                                | HC                               | I-E, ED                 | SC                                          | GTR                           | 0 (0%)                  | 0 (0%)   | 1 (100%) | IX, X, XI, XII                                                              | 0 (0%)   | 24.0           | 1 Alive<br>(100%)           |                   |
| Kyoshima et al. – 2003 <sup>34</sup>      | Case series – IV | 2 /<br>0 (0%)   | 65<br>(57-73)   | 0 (0%)                                                                           | 2 C2 (100%)                       | 1 L (50%)<br>1 R (50%)           | 2 C1-C2 F<br>(100%)              | 2 E, ID-ED<br>(100%)    | 2 CL (C1-<br>C2) (100%)                     | 2<br>GTR(100%)                | 0 (0%)                  | 0 (0%)   | 2 (100%) | 0 (0%)                                                                      | 0 (0%)   | 24.0           | 2 Alive<br>(100%)           |                   |
| Leal Filho et al. – 2003 <sup>35</sup>    | Case series – IV | 2 /<br>1 (50%)  | 51<br>(43-59)   | 1 IX, X (50%)                                                                    | C1                                | 2 R (100%)                       | 2 FM-C1<br>(100%)                | 2 E, ID-ED<br>(100%)    | 2 FL (100%)                                 | 2 GTR<br>(100%)               | 0 (0%)                  | 0 (0%)   | 2 (100%) | 0 (0%)                                                                      | 0 (0%)   | 6.0            | 2 Alive<br>(100%)           |                   |
| Passacantilli et al. – 2003 <sup>36</sup> | Case report – V  | 1 /<br>1 (100%) | 44              | 0 (0%)                                                                           | XII                               | L                                | HC                               | I-ED                    | FL                                          | PTR                           | 0 (0%)                  | 0 (0%)   | 1 (100%) | 0 (0%)                                                                      | 0 (0%)   | 3.0            | 1 Alive<br>(100%)           |                   |
| Tatebayashi et al. – 2003 <sup>37</sup>   | Case report – V  | 1 /<br>0 (0%)   | 46              | XI                                                                               | XI                                | R                                | JF                               | I, ID                   | SC + CL<br>(C1)                             | GTR                           | 0 (0%)                  | 0 (0%)   | 1 (100%) | XI                                                                          | 0 (0%)   | 24.0           | 1 Alive<br>(100%)           |                   |
| Aihara et al. – 2004 <sup>38</sup>        | Case report – V  | 1 /<br>0 (0%)   | 72              | XII                                                                              | XII                               | R                                | HC                               | I-E, ID-ED              | FL                                          | PTR                           | 0 (0%)                  | 0 (0%)   | 1 (100%) | XII                                                                         | 0 (0%)   | 3.0            | 1 Alive<br>(100%)           |                   |
| Ho et al. – 2004 <sup>39</sup>            | Case report – V  | 1 /<br>1 (100%) | 39              | XII                                                                              | XII                               | R                                | FM & HC                          | I-E, ID-ED              | SC-TC                                       | GTR                           | 0 (0%)                  | 0 (0%)   | 1 (100%) | XII                                                                         | 0 (0%)   | 12.0           | 1 Alive<br>(100%)           |                   |
| Kadri et al. – 2004 <sup>40</sup>         | Case series – IV | 6 /<br>3 (50%)  | 31<br>(23-42)   | 6 IX, X (100%)<br>4 XI, XII (66.7%)<br>2 VIII (33.3%)<br>1 V, VI, VII<br>(16.7%) | 3 X (50%)<br>3 IX-X-XI<br>(50%)   | 4 L<br>(66.7%)<br>2 R<br>(33.3%) | 6 JF (100%)                      | 6 I-E, ID-<br>ED (100%) | 6 TC + SJ<br>(83.3%)<br>1 TC<br>(16.7%)     | 6 GTR<br>(100%)               | 0 (0%)                  | 0 (0%)   | 6 (100%) | 6 IX, X (100%)<br>4 XI, XII<br>(66.7%)<br>2 VIII (33.3%)<br>1 V, VI (16.7%) | 0 (0%)   | 30.0<br>(2-66) | 6 Alive<br>(100%)           |                   |
| Kim et al. – 2005 <sup>41</sup>           | Case report – V  | 1 /<br>0 (0%)   | 60              | 0 (0%)                                                                           | C1                                | R                                | FM-C1                            | E                       | FL + CL<br>(C1)                             | PTR                           | 0 (0%)                  | 1 (100%) | 1 (100%) | 0 (0%)                                                                      | 0 (0%)   | 2.0            | 1 Alive<br>(100%)           |                   |
| Takumi et al. – 2005 <sup>42</sup>        | Case report – V  | 1 /<br>1 (100%) | 35              | 0 (0%)                                                                           | C1                                | R                                | FM-C1                            | E, ID                   | SC-RS                                       | GTR                           | 0 (0%)                  | 0 (0%)   | 1 (100%) | 0 (0%)                                                                      | 0 (0%)   | 48.0           | 1 Alive<br>(100%)           |                   |
| Sato et al. – 2006 <sup>43</sup>          | Case report – V  | 1 /<br>0 (0%)   | 54              | XII                                                                              | XII                               | L                                | HC                               | I-E, ID-ED              | SC                                          | PTR                           | 0 (0%)                  | 0 (0%)   | 1 (100%) | 0 (0%)                                                                      | 0 (0%)   | 24.0           | 1 Alive<br>(100%)           |                   |
| Ueda et al. – 2006 <sup>44</sup>          | Case series – IV | 3 /<br>0 (0%)   | 54<br>(50-79)   | 0 (0%)                                                                           | 3 C1 (100%)                       | 3 R (100%)                       | 3 FM-C1<br>(100%)                | 3 E, ID<br>(100%)       | 3 SC-TC +<br>CL (C1-C2)<br>(100%)           | 3 GTR<br>(100%)               | 1 CSF leak<br>(33.3%)   | 0 (0%)   | 1 (100%) | 0 (0%)                                                                      | 0 (0%)   | 79<br>(38-88)  | 3 Alive<br>(100%)           |                   |
| Kikkawa et al. – 2007 <sup>45</sup>       | Case report – V  | 1 /<br>0 (0%)   | 36              | VII, IX, X                                                                       | XII                               | L                                | FM-C1                            | I, ID                   | SC + CL<br>(C1)                             | GTR                           | 0 (0%)                  | 0 (0%)   | 1 (100%) | XII                                                                         | 0 (0%)   | 3.0            | 1 Alive<br>(100%)           |                   |
| Kim et al. – 2007 <sup>46</sup>           | Case report – V  | 1 /<br>0 (0%)   | 68              | XII                                                                              | XII                               | L                                | HC                               | I, ID                   | SC-RS                                       | GTR                           | 0 (0%)                  | 0 (0%)   | 1 (100%) | XII                                                                         | 0 (0%)   | 6.0            | 1 Alive<br>(100%)           |                   |
| Tucker et al. – 2007 <sup>47</sup>        | Case report – V  | 1 /<br>0 (0%)   | 31              | XII                                                                              | XII                               | L                                | HC                               | I-E, ID-ED              | SC                                          | PTR                           | Dysphagia               | 0 (0%)   | 1 (100%) | XII                                                                         | 1 (100%) | 15.0           | 27.0                        | 1 Alive<br>(100%) |
| Ciappetta et al. – 2008 <sup>48</sup>     | Case report – V  | 1 /<br>0 (0%)   | 44              | XI                                                                               | C2                                | L                                | C1-C2 F                          | I-E, ID                 | CL (C1-C5)                                  | GTR                           | 0 (0%)                  | 0 (0%)   | 1 (100%) | 0 (0%)                                                                      | 0 (0%)   | 6.0            | 1 Alive<br>(100%)           |                   |
| Garg et al. – 2008 <sup>49</sup>          | Case series – IV | 1 /             | 35              | XII                                                                              | XII                               | R                                | HC                               | I-E, ID-ED              | SC-RS                                       | PTR                           | Hemiplegia              | 0 (0%)   | 1 (100%) | XII                                                                         | 1 (100%) | 1.0            | 2.0                         | 1 Dead            |

|                                            |                  |                         |                 |                                                                                                                                                                                                                               |                                                                |                             |                                                     |                                                                                                      |                                                        |                                  |                                                                                                                           |           |            |                                                                                                              |           |                |                                   |                                   |
|--------------------------------------------|------------------|-------------------------|-----------------|-------------------------------------------------------------------------------------------------------------------------------------------------------------------------------------------------------------------------------|----------------------------------------------------------------|-----------------------------|-----------------------------------------------------|------------------------------------------------------------------------------------------------------|--------------------------------------------------------|----------------------------------|---------------------------------------------------------------------------------------------------------------------------|-----------|------------|--------------------------------------------------------------------------------------------------------------|-----------|----------------|-----------------------------------|-----------------------------------|
| Kuo et al. – 2008 <sup>50</sup>            | Case report – V  | 0 (0%)<br>1 /<br>0 (0%) | 25              | XII                                                                                                                                                                                                                           | XII                                                            | R                           | HC                                                  | I-E, ED                                                                                              | FL-SC                                                  | PTR                              | 0 (0%)                                                                                                                    | 0 (0%)    | 0 (0%)     | XII                                                                                                          | 0 (0%)    | 6.0            | (100%)<br>1 Alive<br>(100%)       |                                   |
| Chibbaro et al. – 2009 <sup>51</sup>       | Case series – IV | 16 /<br>3 (18.8%)       | 41<br>(16-71)   | 5 IX, X (31.3%)<br>3 IX, X, XI (18.2%)<br>2 X (12.5%)<br>1 V (6.3%)<br>1 V, X (6.3%)<br>1 VIII, IX, X, XI (6.3%)                                                                                                              | 7 IX-X-XI (43.7%)<br>7 IX (43.7%)<br>1 X (6.3%)<br>1 XI (6.3%) | 9 R (56.3%)<br>7 L (43.7%)  | 16 JF (100%)                                        | 13 I (81.3%)<br>3 E (18.7%)                                                                          | 16 TC (100%)                                           | 13 GTR (81.3%)<br>3 PTR (18.7%)  | 4 Dysphagia (25%)<br>1 CSF leak (6.3%)<br>1 Aspiration pneumo (6.3%)                                                      | 0 (0%)    | 16 (100%)  | 5 IX, X (31.3%)<br>2 IX, X, XI (12.5%)                                                                       | 0 (0%)    | 94<br>(24-252) | 16 Alive<br>(100%)                |                                   |
| Heiroth et al. – 2009 <sup>52</sup>        | Case report – V  | 1 /<br>0 (0%)           | 23              | XII                                                                                                                                                                                                                           | XII                                                            | R                           | HC                                                  | E, ED                                                                                                | FL                                                     | GTR                              | Hoarseness                                                                                                                | 0 (0%)    | 1 (100%)   | X, XII                                                                                                       | 0 (0%)    |                | 1 Alive<br>(100%)                 |                                   |
| Ichimura et al. – 2009 <sup>53</sup>       | Case series – IV | 7 /<br>3 (42.9%)        | 50<br>(38-71)   | 3 IX, X, XII (42.9%)<br>2 XII (28.6%)<br>2 IX, X, XI, XII (28.6%)                                                                                                                                                             | 7 XII (100%)                                                   | N/A                         | 7 HC (100%)                                         | 6 I-E, ID-ED (85.7%)<br>1 E, ED (14.3%)                                                              | 7 SC + CL (C1) (100%)                                  | 4 PTR (66.7%)<br>2 GTR (33.3%)   | 1 Venous thrombosis (14.3%)                                                                                               | 3 (42.9%) | 7 (100%)   | 7 XII (100%)                                                                                                 | 0 (0%)    | 6.0            | 6 Alive (85.7%)<br>1 Dead (14.3%) |                                   |
| Mathiesen et al. – 2009 <sup>54</sup>      | Case series – IV | 2 /<br>1 (50%)          | 53              | 2 XII (100%)                                                                                                                                                                                                                  | 2 XII (100%)                                                   | 2 L (100%)                  | 2 HC (100%)                                         | 2 I-E, ID-ED (100%)                                                                                  | 2 RS + CL (C1) (100%)                                  | 2 GTR (100%)                     | 1 CSF leak, dysphagi (50%)                                                                                                | 0 (0%)    | 2 (100%)   | 1 IX, X, XII (50%)                                                                                           | 0 (0%)    | 15.0<br>(6-24) | 2 Alive<br>(100%)                 |                                   |
| Watanabe et al. – 2009 <sup>55</sup>       | Case series – IV | 9 /<br>6 (66.7%)        | 54<br>(22-68)   | 0 (0%)                                                                                                                                                                                                                        | 5 C2 (55.6%)<br>4 C1 (44.4%)                                   | N/A                         | 9 C1-C2 F (55.6%)                                   | 9 E, ID-ED (100%)                                                                                    | 9 SC (100%)                                            | 9 PTR (100%)                     | 1 CSF leak (11.1%)                                                                                                        | 0 (0%)    | 9 (100%)   | 0 (0%)                                                                                                       | 2 (22.2%) | 12.0           | 30.0<br>(7-180)                   | 9 Alive<br>(100%)                 |
| Edizer et al. – 2010 <sup>56</sup>         | Case report – V  | 1 /<br>0 (0%)           | 34              | 0 (0%)                                                                                                                                                                                                                        | XII                                                            | R                           | FM                                                  | E, ED                                                                                                | CL (C1)                                                | GTR                              | 0 (0%)                                                                                                                    | 0 (0%)    | 0 (0%)     | XII                                                                                                          | 0 (0%)    | 3.0            | 1 Alive<br>(100%)                 |                                   |
| Ishikawa et al. – 2010 <sup>57</sup>       | Case report – V  | 1 /<br>1 (100%)         | 54              | X, XII                                                                                                                                                                                                                        | XII                                                            | L                           | HC                                                  | I, ID                                                                                                | SC-TC                                                  | PTR                              | 0 (0%)                                                                                                                    | 0 (0%)    | 0 (0%)     | X, XII                                                                                                       | 0 (0%)    | 12.0           | 1 Alive<br>(100%)                 |                                   |
| Ji et al. – 2010 <sup>58</sup>             | Case report – V  | 1 /<br>1 (100%)         | 44              | 0 (0%)                                                                                                                                                                                                                        | C1-C2                                                          | L                           | C1-C2 F                                             | E, ID                                                                                                | CL (C1-C2)                                             | GTR                              | 0 (0%)                                                                                                                    | 0 (0%)    | 1 (100%)   | 0 (0%)                                                                                                       | 0 (0%)    | 3.0            | 1 Alive<br>(100%)                 |                                   |
| Li et al. – 2010 <sup>59</sup>             | Case report – V  | 1 /<br>0 (0%)           | 36              | 0 (0%)                                                                                                                                                                                                                        | XII                                                            | R                           | FM & HC                                             | I, ID                                                                                                | SC                                                     | PTR                              | 0 (0%)                                                                                                                    | 0 (0%)    | 1 (100%)   | XII                                                                                                          | 1 (100%)  | 20.0           | 24.0                              | 1 Alive<br>(100%)                 |
| Cavalcanti et al. – 2010 <sup>60</sup>     | Case series – IV | 36 /<br>19<br>(52.8%)   | 43<br>(17-68)   | 5 X (13.9%)<br>1 XII (2.8%)<br>1 VII, VIII (2.8%)<br>1 XI, XII (2.8%)<br>1 V, IX, X (2.8%)<br>1 VII,VIII,X (2.8%)<br>1 IX, XI, XI (2.8%)<br>1 VII, VIII, IX, X (2.8%)<br>1 VIII, IX, X, XII (2.8%)<br>1 IX, X, XI, XII (2.8%) | 17 IX-X-XI (47.2%)<br>13 C1-C2 (36.1%)<br>6 XII (16.7%)        | 14 L (38.9%)<br>9 R (25%)   | 17 JF (47.2%)<br>13 C1-C2 F (36.1%)<br>6 HC (16.7%) | 16 ED-ID (44.4%)<br>15 ID (41.7%)<br>5 ED (13.9%)<br>10 I (10 (27.8%)<br>4 I-E (11.1%)<br>2 E (5.6%) | 20 FL (55.6%)<br>13 CL (C1-C2) (36.1%)<br>8 RS (22.2%) | 25 GTR (69.4%)<br>11 PTR (30.6%) | 8 Dysphagia (22.2%)<br>3 Aspiration pneumonia (8.3%)<br>3 CSF leak (8.3%)<br>1Hydrocephalus (2.8%)<br>1 Meningitis (2.8%) | 8 (22.2%) | 19 (52.8%) | 7 X (19.4%)<br>3 XII (8.3%)<br>3 IX, X, XI (8.3%)<br>1 IX (2.8%)<br>1 VII,VIII (2.8%)<br>1 VII, IX, X (2.8%) | 1 (2.8%)  | 12             | 25<br>(0-110)                     | 35 Alive (97.2%)<br>1 Dead (2.8%) |
| Takami et al. – 2010 <sup>61</sup>         | Case series – IV | 8 /<br>1 (12.5%)        | 49.5<br>(19-65) | 0 (0%)                                                                                                                                                                                                                        | 7 C2 (87.5%)<br>1 C1 (12.5%)                                   | N/A                         | 8 C1-C2 F (100%)                                    | 8 E, ID-ED (100%)                                                                                    | 8 CL (C1-C2) (100%)                                    | 8 GTR (100%)                     | 0 (0%)                                                                                                                    | 0 (0%)    | 8 (100%)   | 0 (0%)                                                                                                       | 0 (0%)    | 3.0            | 8 Alive<br>(100%)                 |                                   |
| Gopalakrishnam et al. – 2011 <sup>62</sup> | Case report – V  | 1 /<br>1 (100%)         | 40              | 0 (0%)                                                                                                                                                                                                                        | C1                                                             | M                           | FM-C1 (100%)                                        | I-E, ID-ED                                                                                           | SC                                                     | GTR                              | 0 (0%)                                                                                                                    | 0 (0%)    | 1 (100%)   | 0 (0%)                                                                                                       | 0 (0%)    | 1.0            | 1 Alive<br>(100%)                 |                                   |
| Ramzan et al. – 2011 <sup>63</sup>         | Case report – V  | 1 /<br>0 (0%)           | 14              | 0 (0%)                                                                                                                                                                                                                        | C1-C2                                                          | L                           | FM-C2                                               | I-E, ID-ED                                                                                           | SC + CL (C1-C3)                                        | PTR                              | 0 (0%)                                                                                                                    | 0 (0%)    | 1 (100%)   | 0 (0%)                                                                                                       | 0 (0%)    | 3.0            | 1 Alive<br>(100%)                 |                                   |
| Nonaka et al. – 2011 <sup>64</sup>         | Case series – IV | 13 /<br>8 (61.5%)       | 44<br>(13-71)   | 6 XII (46.1%)<br>3 IX, X, XII (23.1%)<br>1 IX, X (7.7%)                                                                                                                                                                       | 13 XII (100%)                                                  | 11 R (84.6%)<br>2 L (15.4%) | 13 HC (100%)                                        | 7 I-E, ID-ED (53.8%)<br>5 I, ID (38.5%)<br>1 E, ED (7.7%)                                            | 13 ELITE (100%)                                        | 10 GTR (76.9%)<br>3 PTR (23.1%)  | 4 Hoarseness (30.8%)<br>3 Dysphagia (23.1%)<br>1 CSF leak (7.7%)                                                          | 0 (0%)    | 13 (100%)  | 6 XII (46.1%)<br>4 X (30.8%)<br>3 IX, X (23.1%)<br>3 IX, X, XII (23.1%)<br>1 VII (7.7%)                      | 1 (7.7%)  | 48             | 6<br>(9-168)                      | 13 Alive<br>(100%)                |
| Wang et al. – 2011 <sup>65</sup>           | Case series – IV | 18 /<br>10<br>(55.6%)   | 47<br>(24-72)   | 0 (0%)                                                                                                                                                                                                                        | 16 C2 (88.9%)<br>2 C1 (11.1%)                                  | N/A                         | 18 C1-C2 F (100%)                                   | 14 E, ID-ED (77.8%)<br>4 E, ED (22.2%)                                                               | 18 FL (100%)                                           | 15 GTR (83.3%)<br>3 PTR (16.7%)  | 2 CSF leak (11.1%)<br>1 Infection wound (5.5%)                                                                            | 0 (0%)    | 12 (66.7%) | 0 (0%)                                                                                                       | 1 (5.6%)  | 48             | 43<br>(3-110)                     | 17 Alive (94.4%)<br>1 Dead (5.6%) |
| Zhang et al. – 2011 <sup>66</sup>          | Case series – IV | 3 /<br>1 (33.3%)        | 59<br>(58.61)   | 2 XII (66.7%)<br>1 IX, X, XII (33.3%)                                                                                                                                                                                         | 3 XII (100%)                                                   | 3 R (100%)                  | 3 HC (100%)                                         | 3 E (100%)                                                                                           | 3 Endoscopic Transoral (100%)                          | 3 GTR (100%)                     | 1 Dysphagia (33.3%)                                                                                                       | 0 (0%)    | 3 (100%)   | 2 IX, X, XII (66.7%)<br>1 XII (33.3%)                                                                        | 0 (0%)    | 6.0            | 3 Alive<br>(100%)                 |                                   |
| Helms et al. – 2012 <sup>67</sup>          | Case report – V  | 1 /<br>0 (0%)           | 29              | 0 (0%)                                                                                                                                                                                                                        | C1                                                             | L                           | FM-C1                                               | I-E, ID-ED                                                                                           | FL + CL (C1-C2)                                        | GTR                              | 0 (0%)                                                                                                                    | 0 (0%)    | 1 (100%)   | 0 (0%)                                                                                                       | 0 (0%)    | 36.0           | 1 Alive<br>(100%)                 |                                   |
| Nakamizo et al. – 2012 <sup>68</sup>       | Case report – V  | 1 /<br>1 (100%)         | 49              | 0 (0%)                                                                                                                                                                                                                        | C2                                                             | R                           | C1-C2 F                                             | E, ED                                                                                                | CL (C1-C2)                                             | GTR                              | 0 (0%)                                                                                                                    | 0 (0%)    | 1 (100%)   | 0 (0%)                                                                                                       | 0 (0%)    | 3.0            | 1 Alive<br>(100%)                 |                                   |
| Ohba et al. – 2012 <sup>69</sup>           | Case report – V  | 1 /<br>1 (100%)         | 37              | V, IX, X, XI, XII                                                                                                                                                                                                             | XII                                                            | L                           | HC                                                  | I-E, ID-ED                                                                                           | SC                                                     | PTR                              | 0 (0%)                                                                                                                    | 0 (0%)    | 1 (100%)   | V, IX, X, XI, XII                                                                                            | 1 (100%)  | 24.0           | 108.0                             | 1 Alive<br>(100%)                 |

|                                                     |                  |                   |               |                                                                                                                                                                               |                                                             |                                                |                                             |                                                                   |                                                       |                                      |                                                                                       |           |           |                                                                                                       |          |      |                 |                                         |
|-----------------------------------------------------|------------------|-------------------|---------------|-------------------------------------------------------------------------------------------------------------------------------------------------------------------------------|-------------------------------------------------------------|------------------------------------------------|---------------------------------------------|-------------------------------------------------------------------|-------------------------------------------------------|--------------------------------------|---------------------------------------------------------------------------------------|-----------|-----------|-------------------------------------------------------------------------------------------------------|----------|------|-----------------|-----------------------------------------|
| <b>Oyama et al. – 2012<sup>70</sup></b>             | Case report – V  | 1 /<br>1 (100%)   | 25            | XII                                                                                                                                                                           | XII                                                         | R                                              | HC                                          | I-E, ID-ED                                                        | TC                                                    | PTR                                  | Dysphagia                                                                             | 1 (100%)  | 0 (0%)    | XII                                                                                                   | 0 (0%)   | 25.0 | 37.0            | 1 Alive<br>(100%)                       |
| <b>Santarius et al. – 2012<sup>71</sup></b>         | Case report – V  | 1 /<br>0 (0%)     | 9             | VII                                                                                                                                                                           | XII                                                         | L                                              | HC                                          | I-E, ID-ED                                                        | SC                                                    | GTR                                  | Hemiparesis                                                                           | 0 (0%)    | 1 (100%)  | XII                                                                                                   | 1 (100%) |      | 12.0            | 1 Alive<br>(100%)                       |
| <b>Wan et al. – 2012<sup>72</sup></b>               | Case series – IV | 8 /<br>4 (50%)    | 49<br>(31-58) | 4 VII, VIII, IX, X,<br>XI (50%)<br>2 IX, X, XII (25%)<br>1 X (12.5%)<br>1 VIII, IX, XII<br>(12.5%)                                                                            | 8 IX-X-XI<br>(100%)                                         | N/A                                            | 8 JF (100%)                                 | 8 I-E, ID-<br>ED (100%)                                           | 8 RS-SJ<br>(100%)                                     | 7 GTR<br>(87.5%)<br>1 PTR<br>(12.5%) | 2 CSF leak<br>(25%)<br>1 Aspiration<br>pneumonia<br>(12.5%)<br>1 Dysphagia<br>(12.5%) | 1 (12.5%) | 8 (100%)  | 4 VII, VIII, IX,<br>X, XI (50%)<br>2 IX, X, XII<br>(25%)<br>1 X (12.5%)<br>1 VIII, IX, XII<br>(12.5%) | 0 (0%)   |      | 38<br>(23-60)   | 1 Alive<br>(100%)                       |
| <b>Zhang et al. – 2012<sup>73</sup></b>             | Case series – IV | 3 /<br>0 (0%)     | 42<br>(16-43) | 1 X, XII (33.3%)<br>1 VII, VIII, XII<br>(33.3%)                                                                                                                               | 3 XII (100%)                                                | 2 L<br>(66.7%)<br>1 R<br>(33.3%)               | JF & HC                                     | 3 I-E, ID-<br>ED (100%)                                           | 3 Endo-<br>scopic Tran-<br>soral (100%)               | 3 GTR<br>(100%)                      | 0 (0%)                                                                                | 0 (0%)    | 3 (100%)  | 1 X (33.3%)<br>1 XII (33.3%)                                                                          | 0 (0%)   |      | 4.0<br>(2-6)    | 3 Alive<br>(100%)                       |
| <b>Baghel et al. – 2013<sup>74</sup></b>            | Case report – V  | 1 /<br>1 (100%)   | 40            | XII                                                                                                                                                                           | XII                                                         | L                                              | HC                                          | I-E, ID-ED                                                        | SC-RS + CL<br>(C1)                                    | PTR                                  | 0 (0%)                                                                                | 0 (0%)    | 1 (100%)  | XII                                                                                                   | 0 (0%)   |      | 2.0             | 1 Alive<br>(100%)                       |
| <b>Chowdhury et al. – 2013<sup>75</sup></b>         | Case series – IV | 14 /<br>7 (50%)   | 31<br>(10-53) | 0 (0%)                                                                                                                                                                        | 11 C1 (84.6%)<br>2 C2 (15.4%)                               | 8 L<br>(57.1%)<br>6 R<br>(43.9%)               | 11 FM-C1<br>(84.6%)<br>2 C1-C2 F<br>(15.4%) | 6 E, ID-ED<br>(46.2%)<br>5 E, ID<br>(38.5%)<br>3 E, ED<br>(23.1%) | 14 SC + CL<br>(C1-C2<br>(100%)                        | 14 GTR<br>(100%)                     | 2 CSF leak<br>(15.4%)<br>1 Aspiration<br>pneumonia<br>(7.1%)                          | 0 (0%)    | 14 (100%) | 0 (0%)                                                                                                | 0 (0%)   |      | 8.0<br>(3-12)   | 13 Alive<br>(92.9%)<br>1 Dead<br>(7.1%) |
| <b>Xiao et al. – 2013<sup>76</sup></b>              | Case series – IV | 11 /<br>3 (27.3%) | 50<br>(31-59) | 6 IX, XII (54.5%)<br>2 VII, IX, XII<br>(18.2%)<br>2 VIII, IX, X, XII<br>(18.2%)<br>1 XII (9.1%)                                                                               | 11 XI (100%)                                                | 7 R<br>(63.6%)<br>4 L<br>(36.4%)               | 11 HC<br>(100%)                             | 11 I-E<br>(100%)                                                  | 11 FL<br>(100%)                                       | 10 GTR<br>(90.9%)<br>1 PTR<br>(9.1%) | 2 Pneumonia<br>(18.2%)<br>1 Meningitis<br>(9.1%)                                      | 0 (0%)    | 11 (100%) | N/A                                                                                                   | 0 (0%)   |      | 14<br>(3-25)    | 11 Alive<br>(100%)                      |
| <b>Nowak et al. – 2014<sup>77</sup></b>             | Case series – IV | 10 /<br>6 (60%)   | 38<br>(25-54) | 2 IX, X, XI (20%)<br>2 VII, VIII, IX, X<br>(20%)<br>1 VIII (10%)<br>1 XI (10%)<br>1 V, VII, VIII, IX<br>(10%)<br>1 IX, X, XI, XII<br>(10%)<br>1 VII, VIII, IX, X,<br>XI (10%) | 5 IX-X-XI<br>(50%)<br>3 IX (30%)<br>1 X (10%)<br>1 XI (10%) | N/A                                            | 10 JF<br>(100%)                             | 8 I, ED<br>(80%)<br>2 I, ID<br>(20%)                              | 8 SC-CL<br>(C1) (80%)<br>2 RS (20%)                   | 10 GTR<br>(100%)                     | 6 Paresis<br>(60%)                                                                    | 0 (0%)    | 4 (40%)   | 5 VIII (50%)<br>5 X (50%)<br>4 XI (40%)<br>3 VII (30%)<br>3 IX (30%)<br>1 V (10%)                     | 1 (10%)  | 40   | 28<br>(6-71)    | 10 Alive<br>(100%)                      |
| <b>Suri et al. – 2014<sup>78</sup></b>              | Case series – IV | 14 /<br>8 (57.1%) | 35<br>(15-63) | 14 XII (100%)<br>8 IX, X (57.1%)                                                                                                                                              | 14 XII (100%)                                               | 9 R<br>(69.2%)<br>4 L<br>(30.8%)<br>1 B (7.1%) | 14 HC<br>(100%)                             | 13 I, ID<br>(92.9%)<br>1 I, ID-ED<br>(7.1%)                       | 9 RS<br>(64.3%)<br>3 SC<br>(21.4%)<br>2 FL<br>(14.3%) | 9 PTR<br>(64.3%)<br>5 GTR<br>(35.7%) | 2 Infection<br>wound<br>(14.3%)<br>1 CSF leak<br>(7.1%)                               | 7 (50%)   | 14 (100%) | 14 XII (100%)                                                                                         | 0 (0%)   |      | 32<br>(3-59)    | 14 Alive<br>(100%)                      |
| <b>Yu et al. – 2014<sup>79</sup></b>                | Case series – IV | 9 /<br>5 (55.6%)  | 52<br>(21-69) | 0 (0%)                                                                                                                                                                        | 9 C2 (100%)                                                 | 5 R<br>(55.6%)<br>4 L<br>(44.4%)               | 9 C1-C2 F<br>(100%)                         | 8 E, ID-ED<br>(88.9%)<br>1 E, ED<br>(11.1%)                       | 9 SC + CL<br>(C1-C2<br>(100%)                         | 9 GTR<br>(100%)                      | 2 C2 deficit<br>(22.2%)                                                               | 0 (0%)    | 9 (100%)  | 0 (0%)                                                                                                | 0 (0%)   |      | 34<br>(5-72)    | 9 Alive<br>(100%)                       |
| <b>Feldman et al. – 2015<sup>80</sup></b>           | Case report – V  | 1 /<br>1 (100%)   | 64            | 0 (0%)                                                                                                                                                                        | C2                                                          | R                                              | C1-C2 F                                     | E, ID-ED                                                          | FL + CL<br>(C1-C2)                                    | GTR                                  | 0 (0%)                                                                                | 0 (0%)    | 1 (100%)  | 0 (0%)                                                                                                | 1 (100%) | 12.0 | 36.0            | 1 Alive<br>(100%)                       |
| <b>Hayashi et al. – 2015<sup>81</sup></b>           | Case series – IV | 8 /<br>5 (62.5%)  | 44<br>(38-72) | 4 XII (50%)<br>3 X, XII (37.5%)<br>1 IX, X, XII<br>(12.5%)                                                                                                                    | 8 XII (100%)                                                | 5 L<br>(62.5%)<br>3 R<br>(37.5%)               | 8 HC<br>(100%)                              | 8 I, ID<br>(100%)                                                 | 6 TC (75%)<br>2 SC (25%)                              | 8 PTR<br>(100%)                      | 0 (0%)                                                                                | 0 (0%)    | 8 (100%)  | N/A                                                                                                   | 0 (0%)   |      | 6.0<br>(3-12)   | 1 Alive<br>(100%)                       |
| <b>Jiang et al. – 2015<sup>82</sup></b>             | Case series – IV | 6 /<br>5 (83.3%)  | 54<br>(37-72) | 0 (0%)                                                                                                                                                                        | 5 C1 (83.3%)<br>1 C2 (16.7%)                                | N/A                                            | 6 FM-C2<br>(100%)                           | 6 E (100%)                                                        | 6 CL (C1)<br>(100%)                                   | 6 GTR<br>(100%)                      | 2 CSF leak<br>(33.3%)                                                                 | 0 (0%)    | 5 (83.3%) | 0 (0%)                                                                                                | 0 (0%)   |      | 33.5<br>(24-42) | 1 Alive<br>(100%)                       |
| <b>Oichi et al. – 2015<sup>83</sup></b>             | Case report – V  | 1 /<br>1 (100%)   | 64            | 0 (0%)                                                                                                                                                                        | C2                                                          | L                                              | C1-C2 F                                     | E, ED                                                             | CL (C1)                                               | GTR                                  | 0 (0%)                                                                                | 0 (0%)    | 1 (100%)  | 0 (0%)                                                                                                | 0 (0%)   |      | 6.0             | 1 Alive<br>(100%)                       |
| <b>Puchalska-Niedbal et al. – 2015<sup>84</sup></b> | Case report – V  | 1 /<br>0 (0%)     | 24            | 0 (0%)                                                                                                                                                                        | C1                                                          | N/A                                            | FM-C1                                       | E, ID                                                             | SC + CL<br>(C1-C2)                                    | PTR                                  | 0 (0%)                                                                                | 0 (0%)    | 1 (100%)  | 0 (0%)                                                                                                | 0 (0%)   |      | 2.0             | 1 Alive<br>(100%)                       |
| <b>Yu et al. – 2015<sup>85</sup></b>                | Case report – V  | 1 /<br>1 (100%)   | 61            | XII                                                                                                                                                                           | XII                                                         | L                                              | HC                                          | I-E, ID-ED                                                        | FL-SC                                                 | GTR                                  | 0 (0%)                                                                                | 0 (0%)    | 1 (100%)  | XII                                                                                                   | 0 (0%)   |      | 24.0            | 1 Alive<br>(100%)                       |
| <b>Bhatoo et al. – 2016<sup>86</sup></b>            | Case report – V  | 1 /               | 47            | IX, X, XII                                                                                                                                                                    | XII                                                         | L                                              | HC                                          | I, E, ID                                                          | RS                                                    | GTR                                  | 0 (0%)                                                                                | 0 (0%)    | 1 (100%)  | XII                                                                                                   | 0 (0%)   |      | 6.0             | 1 Alive                                 |

|                                               |                  |                           |                 |                                                |                                                     |            |                    |                                                  |                                                    |                  |                                                               |        |           |         |        |                |                             |
|-----------------------------------------------|------------------|---------------------------|-----------------|------------------------------------------------|-----------------------------------------------------|------------|--------------------|--------------------------------------------------|----------------------------------------------------|------------------|---------------------------------------------------------------|--------|-----------|---------|--------|----------------|-----------------------------|
| <b>Liebelt et al. – 2016<sup>87</sup></b>     | Case report – V  | 0 (0%)<br>1 /<br>1 (100%) | 58              | 0 (0%)                                         | C1                                                  | R          | FM-C1              | I-E, ID-ED                                       | SC + CL<br>(C1)                                    | PTR              | 0 (0%)                                                        | 0 (0%) | 0 (0%)    | 0 (0%)  | 0 (0%) | 3.0            | (100%)<br>1 Alive<br>(100%) |
| <b>Yoon et al. – 2016<sup>88</sup></b>        | Case report – V  | 1 /<br>0 (0%)             | 32              | 0 (0%)                                         | C2                                                  | L          | C1-C2 F            | I-E, ID-ED                                       | SC + CL<br>(C1)                                    | GTR              | 0 (0%)                                                        | 0 (0%) | 0 (0%)    | 0 (0%)  | 0 (0%) | 1.5            | 1 Alive<br>(100%)           |
| <b>Inoue et al. – 2017<sup>89</sup></b>       | Case report – V  | 1 /<br>1 (100%)           | 61              | XII                                            | XII                                                 | R          | HC                 | I-E, ID-ED                                       | SC-RS                                              | GTR              | Hoarse, dys-<br>phagia                                        | 0 (0%) | 0 (0%)    | XII     | 0 (0%) | 12.0           | 1 Alive<br>(100%)           |
| <b>Lee et al. – 2017<sup>90</sup></b>         | Case report – V  | 1 /<br>1 (100%)           | 57              | 0 (0%)                                         | C2                                                  | L          | C1-C2 F            | E, ED                                            | CL (C2-C3)                                         | GTR              | SAH                                                           | 0 (0%) | 0 (0%)    | 0 (0%)  | 0 (0%) | 2.0            | 1 Alive<br>(100%)           |
| <b>Pisani et al. – 2017<sup>91</sup></b>      | Case report – V  | 1 /<br>0 (0%)             | 37              | 0 (0%)                                         | C1                                                  | L          | FM-C1              | E, ED                                            | SC                                                 | GTR              | 0 (0%)                                                        | 0 (0%) | 1 (100%)  | 0 (0%)  | 0 (0%) | 6.0            | 1 Alive<br>(100%)           |
| <b>Goel et al. – 2018<sup>92</sup></b>        | Case series – IV | 50 /<br>36 (72%)          | 36<br>(14-70)   | 0 (0%)                                         | 50 C2 (100%)                                        | 5 B (10%)  | 50 C1-C2<br>(100%) | 50 E, ID<br>(100%)                               | 50 CL (C1-<br>C3) (100%)                           | 50 PTR<br>(100%) | N/A                                                           | 0 (0%) | 50 (100%) | 0 (0%)  | 0 (0%) | 68<br>(3-120)  | 50 Alive<br>(100%)          |
| <b>Heda et al. – 2018<sup>93</sup></b>        | Case report – V  | 1 /<br>0 (0%)             | 40              | XII                                            | XII                                                 | L          | JF & HC            | E, ED                                            | SC-RS                                              | PTR              | 0 (0%)                                                        | 0 (0%) | 1 (100%)  | XII     | 0 (0%) | 3.0            | 1 Alive<br>(100%)           |
| <b>Matsuda et al. – 2018<sup>94</sup></b>     | Case report – IV | 2 /<br>2 (100%)           | 61.5<br>(53-70) | 0 (0%)                                         | 2 C2 (100%)                                         | 2 R (100%) | C1-C2 F            | 1 E, ED<br>(50%)<br>1 E, ID-ED<br>(50%)          | 1 CL (C1-C2<br>(50%)<br>1SC+CL<br>(C1-C2)<br>(50%) | 2 GTR<br>(100%)  | 0 (0%)                                                        | 0 (0%) | 0 (0%)    | 0 (0%)  | 0 (0%) | 3.0            | 2 Alive<br>(100%)           |
| <b>Park et al. – 2018<sup>95</sup></b>        | Case report – V  | 1 /<br>1 (100%)           | 54              | 0 (0%)                                         | C2                                                  | R          | C1-C2 F            | E, ID                                            | CL (C1)                                            | PTR              | 0 (0%)                                                        | 0 (0%) | 1 (100%)  | 0 (0%)  | 0 (0%) | 12.0           | 1 Alive<br>(100%)           |
| <b>Jung et al. – 2019<sup>96</sup></b>        | Case report – V  | 1 /<br>1 (100%)           | 37              | 0 (0%)                                         | C2                                                  | R          | C1-C2 F            | E, ID                                            | CL (C2-C3)                                         | GTR              | 0 (0%)                                                        | 0 (0%) | 1 (100%)  | 0 (0%)  | 0 (0%) | 1.0            | 1 Alive<br>(100%)           |
| <b>Di Pascuale et al. – 2020<sup>97</sup></b> | Case report – V  | 1 /<br>1 (100%)           | 22              | VIII, IX, X, XII                               | XII                                                 | L          | HC                 | I-E, ED                                          | RS                                                 | PTR              | Dysphagia                                                     | 0 (0%) | 1 (100%)  | 0 (0%)  | 0 (0%) | 12.0           | 1 Alive<br>(100%)           |
| <b>Nakajima et al. – 2020<sup>98</sup></b>    | Case report – V  | 1 /<br>0 (0%)             | 50              | 0 (0%)                                         | C2                                                  | R          | C1-C2 F            | E, ED                                            | CL (C1-C2)                                         | PTR              | 0 (0%)                                                        | 0 (0%) | 1 (100%)  | 0 (0%)  | 0 (0%) | 36.0           | 1 Alive<br>(100%)           |
| <b>Aftahy et al. – 2021<sup>99</sup></b>      | Case series – IV | 9 /<br>2 (22.2%)          | 43<br>(20-71)   | 1 VII (11.1%)<br>1 VIII (11.1%)<br>1 X (11.1%) | 5 IX (55.6%)<br>2 X (22.2%)<br>2 IX-X-XI<br>(22.2%) | N/A        | 9 JF (100%)        | 4 I, ED<br>(44.4%)<br>4 I (44.4%)<br>1 E (11.1%) | 6 RS<br>(66.7%)<br>3 ELITE<br>(33.3%)              | 9 GTR<br>(100%)  | 2Hydrocepha-<br>lus (22.2%)<br>2 Hoarse, hear<br>loss (22.2%) | 0 (0%) | 9 (100%)  | N/A     | 0 (0%) | 16.5<br>(3-84) | 9 Alive<br>(100%)           |
| <b>Fachniadin et al. – 2021<sup>100</sup></b> | Case report – V  | 1 /<br>0 (0%)             | 53              | IX, X, XII                                     | XII                                                 | L          | JF & HC            | I, ID                                            | SC-RS                                              | PTR              | 0 (0%)                                                        | 0 (0%) | 1 (100%)  | XI, XII | 0 (0%) | 1.0            | 1 Alive<br>(100%)           |
| <b>Matsui et al. – 2021<sup>101</sup></b>     | Case report – V  | 1 /<br>0 (0%)             | 54              | 0 (0%)                                         | C1                                                  | R          | FM-C1              | I-E, ID-ED                                       | SC + CL<br>(C1)                                    | PTR              | 0 (0%)                                                        | 0 (0%) | 1 (100%)  | 0 (0%)  | 0 (0%) | 3.0            | 1 Alive<br>(100%)           |

References correspond to **Supplementary File S1**.

**Abbreviations:** **B**, Bilateral; **CL**, Cervical laminectomy/laminoplasty; **E**, Extracranial; **ED**, extradural; **ELITE**, Extreme lateral infrajugular transcondylar-transtubercular exposure; **F**, Foramen; **FL**, Far-lateral; **FM**, Foramen magnum; **GTR**, Gross total resection (100%); **HC**, Hypoglossal canal; **I**, Intracranial; **ID**, Intradural; **JF**, Jugular foramen; **L**, Left; **M**, Midline; **N/A**, Not Available; **OS**, Overall Survival; **PFS**, Progression-free survival; **PTR**, Partial resection (<100%); **R**, Right; **RS**, Retrosigmoid; **SAH**, Subarachnoid hemorrhage; **SC**, Suboccipital craniectomy; **SJ**, Suprajugular; **TC**, Transcondylar.

## References of included articles.

1. Scott M, Wycis HT. Intracranial Neurinoma of the Hypoglossal Nerve. *J Neurosurg*. 1949;6(4):333-336. doi:10.3171/jns.1949.6.4.0333
2. Morelli RJ. Intracranial neurilemmoma of the hypoglossal nerve: Review and case report. *Neurology*. 1966;16(7):709-709. doi:10.1212/WNL.16.7.709
3. Strang RR. Intracranial Neurinoma of the Hypoglossal Nerve. *ANZ J Surg*. 1967;37(2):187-189. doi:10.1111/j.1445-2197.1967.tb04009.x
4. Bartal AD, Djaldetti MM, Mandel EM, Lerner MA. Dumb-bell neurinoma of the hypoglossal nerve. *J Neurol Neurosurg Psychiatry*. 1973;36(4):592-595. doi:10.1136/jnnp.36.4.592
5. Sumra RS, Hölper G, Wanis A. Intramedullary syndrome due to an extradural neurinoma near the foramen magnum. *J Neurol*. 1978;218(2):145-148. doi:10.1007/BF02402174
6. Conrad B, Mergner T. High cervical neurinoma (C1/C2) diagnosed falsely as multiple sclerosis because of trigeminal neuralgia. *Arch für Psychiatr und Nervenkrankheiten*. 1979;227(1):33-37. doi:10.1007/BF00585675
7. Fujiwara S, Hachisuga S, Numaguchi Y. Intracranial hypoglossal neurinoma: Report of a case. *Neuroradiology*. 1980;20(2):87-90. doi:10.1007/BF00339552
8. Ulsø C, Sehested P, Overgaard J. Intracranial hypoglossal neurinoma: Diagnosis and postoperative care. *Surg Neurol*. 1981;16(1):65-68. doi:10.1016/S0090-3019(81)80070-5
9. Berger MS, Edwards MSB, Bingham WG. Hypoglossal Neurilemoma. *Neurosurgery*. 1982;10(5):617-620. doi:10.1227/00006123-198205000-00013
10. Dolan EJ, Tucker WS, Rotenberg D, Chui M. Intracranial hypoglossal schwannoma as an unusual cause of facial nerve palsy. *J Neurosurg*. 1982;56(3):420-423. doi:10.3171/jns.1982.56.3.0420

11. Hakuba A, Komiyama M, Tsujimoto T, et al. Transuncodiscal approach to dumbbell tumors of the cervical spinal canal. *J Neurosurg.* 1984;61(6):1100-1106. doi:10.3171/jns.1984.61.6.1100
12. Tuck RR, Mokri B, Cilluffo JM. Intracranial Schwannoma of the Hypoglossal Nerve. *Arch Neurol.* 1984;41(5):502-505. doi:10.1001/archneur.1984.04050170048015
13. Bettoni L, Baldi P, Bertolino G. CT diagnosis of intracranial neurinoma of the hypoglossal nerve. *J Comput Assist Tomogr.* 9(4):827-828. doi:10.1097/00004728-198507010-00037
14. Lesoin F, Rousseaux M, Martin HJ, Petit H, Jomin M. Astereognosis and amyotrophy of the hand with neurinoma of the second cervical nerve root. *J Neurol.* 1986;233(1):57-58. doi:10.1007/BF00313995
15. Shearman CP, Pearman K, Hockley AD. Dumb-bell schwannoma of the jugular foramen. *Child's Nerv Syst.* 1986;2(1):52-53. doi:10.1007/BF00274037
16. Solymosi L, Wassmann H, Bonse R. Diagnosis of neurinoma in the region of the jugular foramen — a case report. *Neurosurg Rev.* 1987;10(1):41-46. doi:10.1007/BF01780593
17. Nakashima T, Tomita K, Uemura T, Matsushima T, Fukui M. Accessory nerve schwannoma extending extracranially to the second cervical level of vertebra. *J Laryngol Otol.* 1988;102(10):959-961. doi:10.1017/S0022215100106929
18. Crockard HA, Sen CN. The transoral approach for the management of intradural lesions at the craniovertebral junction. *Neurosurgery.* 1991;9(4):88. doi:10.1097/00006123-199101000-00014
19. Kratimenos GP, Crockard HA. The far lateral approach for ventrally placed foramen magnum and upper cervical spine tumours. *Br J Neurosurg.* 1993;7(2):129-140. doi:10.3109/02688699309103469

20. Krauss J, Bertalanffy H, Schwechheimer K, Müller A, Seeger W. Ventral brain stem schwannoma at the entry zone of the hypoglossal nerve. *min - Minim Invasive Neurosurg.* 1993;36(02):66-69. doi:10.1055/s-2008-1053798
21. Kamitani H, Masuzawa H, Kanazawa I, Kubo T, Tokuyama Y. A combined extradural-posterior petrous and suboccipital approach to the jugular foramen tumours. *Acta Neurochir (Wien).* 1994;126(2-4):179-184. doi:10.1007/BF01476430
22. Okura A, Shigemori M, Abe T, Yamashita M, Kojima K, Noguchi S. Hemiatrophy of the tongue due to hypoglossal schwannoma shown by MRI. *Neuroradiology.* 1994;36(3):239-240. doi:10.1007/BF00588142
23. Smith PG, Backer RJ, Kletzer GR, et al. Surgical management of transcranial hypoglossal schwannomas. *Am J Otol.* 1995;16(4):451-456.  
<http://www.ncbi.nlm.nih.gov/pubmed/8588644>
24. Kobayashi S, Otsuka A, Tsunoda T, Inoue HK. Intracranial hypoglossal neurinoma without preoperative hypoglossal nerve paresis--case report. *Neurol Med Chir (Tokyo).* 1996;36(6):384-387. doi:10.2176/nmc.36.384
25. Sato M, Kanai N, Fukushima Y, et al. Hypoglossal neurinoma extending intra- and extracranially: case report. *Surg Neurol.* 1996;45(2):172-175.  
doi:10.1016/s0090-3019(96)80012-7
26. Sairyo K, Henmi T, Endo H. Foramen magnum schwannoma with an unusual clinical presentation: case report. *Spinal Cord.* 1997;35(8):554-556.  
doi:10.1038/sj.sc.3100431
27. Bunc G, Milojković V, Košir G, Kovačič S, Rebol J. Dumb-bell Hypoglossal Neurinoma with Intra- and Extracranial Paravertebral Expansion. *Acta Neurochir (Wien).* 1998;140(11):1209-1210. doi:10.1007/s007010050240
28. Gilsbach JM, Sure U, Mann W. The supracondylar approach to the jugular tubercle and hypoglossal canal. *Surg Neurol.* 1998;50(6):563-570.



doi:10.1016/S0090-3019(97)00378-9

29. Spinnato S, Talacchi A, Musumeci A, Turazzi S, Bricolo A. Dumbbell-Shaped Hypoglossal Neurinoma: Surgical Removal via a Dorsolateral Transcondylar Approach. A Case Report and Review of the Literature. *Acta Neurochir (Wien)*. 1998;140(8):827-832. doi:10.1007/s007010050185
30. Kachhara R, Nair S, Radhakrishnan V V. Large dumbbell neurinoma of hypoglossal nerve: case report. *Br J Neurosurg*. 1999;13(3):338-340. doi:10.1080/02688699943826
31. Hoshi M, Yoshida K, Ogawa K, Kawase T. Hypoglossal neurinoma--two case reports. *Neurol Med Chir (Tokyo)*. 2000;40(9):489-493. doi:10.2176/nmc.40.489
32. Kalavakonda C, Sekhar LN, Jones RV, Rehaman AB. Intermittent vertebral artery compression caused by C1-root schwannoma: Case Report. *Neurol Res*. 2000;22(7):679-684. doi:10.1080/01616412.2000.11740739
33. Mariniello G, Horvat A, Popovic M, Dolenc V V. Cellular dumbbell schwannoma of the hypoglossal nerve presenting without hypoglossal nerve palsy. *Clin Neurol Neurosurg*. 2000;102(1):40-43. doi:10.1016/S0303-8467(99)00079-7
34. Kyoshima K, Uehara T, Koyama J, Idomari K, Yomo S. Dumbbell C2 Schwannomas Involving Both Sensory and Motor Rootlets: Report of Two Cases. *Neurosurgery*. 2003;53(2):436-440. doi:10.1227/01.NEU.0000073992.97761.88
35. Leal Filho MB, Borges G, Ferreira A, França D, Mello P. Schwannoma of the craniocervical junction: surgical approach of two cases. *Arq Neuropsiquiatr*. 2003;61(3A):639-641. doi:10.1590/S0004-282X2003000400021
36. Passacantilli E, Lanzino G, Henn JS, Partovi S, Spetzler RF. Intracranial extradural schwannoma of the 12th cranial nerve. *J Neurosurg*. 2003;98(1):219. doi:10.3171/jns.2003.98.1.0219

37. Tatebayashi K, Tanaka Y, Numata H, Kawakami S, Kamitani H, Watanabe T. Schwannoma of the spinal accessory nerve in the cisterna magna. *Surg Neurol*. 2003;59(3):217-222. doi:10.1016/S0090-3019(02)01035-2
38. Aihara K, Morita A. Dumbbell-shaped hypoglossal schwannoma in an elderly woman: a clinical dilemma. *Surg Neurol*. 2005;63(6):526-528. doi:10.1016/j.surneu.2004.07.045
39. Ho CL, Deruytter MJ. Navigated dorsolateral suboccipital transcondylar (NADOSTA) approach for treatment of hypoglossal schwannoma. *Clin Neurol Neurosurg*. 2005;107(3):236-242. doi:10.1016/j.clineuro.2004.05.004
40. Kadri PAS, Al-Mefty O. Surgical treatment of dumbbell-shaped jugular foramen schwannomas. *Neurosurg Focus*. 2004;17(2):56-62. doi:10.3171/foc.2004.17.2.9
41. Kim JH, Lee JH, Park YK, Kwon TH, Chung HS. C-1 Root Schwannoma with Aggressive Lateral Mass Invasion. *Yonsei Med J*. 2005;46(4):575. doi:10.3349/ymj.2005.46.4.575
42. Takumi I, Isayama K, Osamura RY, Kobayashi S, Teramoto A. Intracisternal neurinoma of the C1 posterior root. *Acta Neurochir (Wien)*. 2005;147(11):1189-1192. doi:10.1007/s00701-005-0618-z
43. Sato K, Shimizu S, Oka H, Nakahara K, Utsuki S, Fujii K. Usefulness of transcervical approach for surgical treatment of hypoglossal schwannoma with paraspinal extension: case report. *Surg Neurol*. 2006;65(4):397-401. doi:10.1016/j.surneu.2005.08.020
44. Ueda R, Yoshida K, Kawase T. Intradural C-1 ventral root schwannomas treated by surgical resection via the lateral suboccipital transcondylar approach--three case reports. *Neurol Med Chir (Tokyo)*. 2006;46(6):298-301. doi:10.2176/nmc.46.298
45. Kikkawa Y, Shono T, Mizoguchi M, Nagata S, Sasaki T. A Case of Intracranial Hypoglossal Neurinoma Without Hypoglossal Nerve Palsy: Operative

- View of the Preserved Rostral Trunk. *min - Minim Invasive Neurosurg.* 2007;50(5):296-299. doi:10.1055/s-2007-984385
46. Kim Y, Ko Y, Yi H, Oh SJ. A Case of Hypoglossal Neurilemmoma Resected Via Burr-hole Craniectomy. *J Korean Neurosurg Soc.* 2007;41:43-46.  
<https://www.jkns.or.kr/journal/view.php?number=1784>
47. Tucker A, Miyake H, Tsuji M, Ukita T, Nishihara K, Ohmura T. Intradural Microsurgery and Extradural Gamma Knife Surgery for Hypoglossal Schwannoma: Case Report and Review of the Literature. *min - Minim Invasive Neurosurg.* 2007;50(6):374-378. doi:10.1055/s-2007-993206
48. Ciappetta P, Colamaria A. Giant craniovertebral junction hemorrhagic schwannoma. *Neurosurgery.* 2008;62(5).  
doi:10.1227/01.NEU.0000316423.20361.5F
49. Garg N, Sampath S. Fatal delayed post-operative cerebral venous thrombosis after excision of hypoglossal nerve schwannoma. *Acta Neurochir (Wien).* 2008;150(6):605-609. doi:10.1007/s00701-008-1498-1
50. Kuo L-T, Huang AP-H, Kuo K-T, Tseng H-M. Extradural dumbbell schwannoma of the hypoglossal nerve: a case report with review of the literature. *Surg Neurol.* 2008;70(SUPPL. 1):S34-S38. doi:10.1016/j.surneu.2007.11.023
51. Chibbaro S, Mirone G, Makiese O, Bresson D, George B. Dumbbell-shaped jugular foramen schwannomas: surgical management, outcome and complications on a series of 16 patients. *Neurosurg Rev.* 2009;32(2):151-159. doi:10.1007/s10143-009-0188-2
52. Heiroth H-J, Riemenschneider MJ, Steiger H-J, Hänggi D. A cylindrical extracranial cranial base neurinoma of the hypoglossal nerve: a rare tumor with a rare localization: case report. *Neurosurgery.* 2009;65(1):E212-3; discussion E213. doi:10.1227/01.NEU.0000347006.02222.CB
53. Ichimura S, Yoshida K, Kawase T. Surgical approach for hypoglossal schwannomas to prevent deformity of the atlanto-occipital joint. *Acta Neurochir (Wien).* 2009;151(6):575-579. doi:10.1007/s00701-009-0284-7

54. Mathiesen T, Svensson M, Lundgren J, Kihlström L, Parisotto R, Bagger-Sjöbäck D. Hypoglossal schwannoma—successful reinnervation and functional recovery of the tongue following tumour removal and nerve grafting. *Acta Neurochir (Wien)*. 2009;151(7):837-841. doi:10.1007/s00701-009-0226-4
55. Watanabe M, Sakai D, Yamamoto Y, Iwashina T, Sato M, Mochida J. Upper cervical spinal cord tumors: review of 13 cases. *J Orthop Sci*. 2009;14(2):175-181. doi:10.1007/s00776-008-1309-4
56. Edizer DT, Mercan H, Cansiz H. Hypoglossal Schwannoma Presenting Only With Headache. *J Craniofac Surg*. 2010;21(1):261-262. doi:10.1097/SCS.0b013e3181c5a37c
57. Ishikawa M, Kusaka G, Takashima K, Kamochi H, Shinoda S. Intraoperative monitoring during surgery for hypoglossal schwannoma. *J Clin Neurosci*. 2010;17(8):1053-1056. doi:10.1016/j.jocn.2009.09.040
58. Ji C, Ahn J-G, Huh H-Y, Park C-K. Cervical Schwannoma Presenting with Acute Intracranial Subarachnoid Hemorrhage. *J Korean Neurosurg Soc*. 2010;47(2):137. doi:10.3340/jkns.2010.47.2.137
59. Li W, Hong X, Wang L, Ge P, Fu S, Luo Y. Large Cystic Hypoglossal Schwannoma with Fluid-Fluid Level: A Case Report. *Skull Base*. 2010;20(03):193-197. doi:10.1055/s-0029-1246219
60. Cavalcanti DD, Martirosyan NL, Verma K, et al. Surgical management and outcome of schwannomas in the craniocervical region. *J Neurosurg*. 2011;114(5):1257-1267. doi:10.3171/2010.5.JNS0966
61. Takami T, Yamagata T, Chokyu I, Ikeda H, Tsuyuguchi N, Ohata K. Surgery of spinal nerve sheath tumors originating from C1 or C2 of high cervical spine. *Neurol Med Chir (Tokyo)*. 2010;50(11):1044-1049. doi:10.2176/nmc.50.1044
62. Gopalakrishnan CV, Baldawa S, Neelima R, Nair S. Giant Cystic Craniovertebral Schwannoma Arising From C1 Dorsal Root Masquerading as a Fourth

- Ventricular Lesion. *Neurosurg Q*. 2011;21(1):60-62. doi:10.1097/WNQ.0b013e3182086a16
63. Ramzan A, Malik KN, Makhdoomi R, Wani A, Jain A. Giant craniocervical schwannoma in a teenage girl. *Child's Nerv Syst*. 2011;27(9):1503-1506. doi:10.1007/s00381-011-1510-1
64. Nonaka Y, Grossi PM, Bulsara KR, Taniguchi RM, Friedman AH, Fukushima T. Microsurgical Management of Hypoglossal Schwannomas Over 3 Decades. *Oper Neurosurg*. 2011;69(SUPPL. 2):ons121-ons140. doi:10.1227/NEU.0b013e31822a547b
65. Wang J, Ou S-W, Wang Y-J, Wu A-H, Wu P-F, Wang Y-B. Microsurgical management of dumbbell C1 and C2 schwannomas via the far lateral approach. *J Clin Neurosci*. 2011;18(2):241-246. doi:10.1016/j.jocn.2010.03.048
66. Zhang Q, Lv H, Wang Z, Guo H, Li M. Endoscopic Transoral Approach for Extracranial Hypoglossal Schwannoma. *ORL*. 2011;73(5):282-286. doi:10.1159/000330270
67. Helms J, Michael L. Large Dumbbell-Shaped C1 Schwannoma Presenting as a Foramen Magnum Mass. *J Neurol Surg Reports*. 2012;73(01):032-036. doi:10.1055/s-0032-1311757
68. Nakamizo A, Suzuki SO, Shimogawa T, et al. Concurrent spinal nerve root schwannoma and meningioma mimicking single-component schwannoma. *Neuropathology*. 2012;32(2):190-195. doi:10.1111/j.1440-1789.2011.01239.x
69. Ohba S, Inaba M, Kinoshita Y, Nakagawa T, Shimizu K, Murakami H. Hypoglossal nerve schwannoma with intratumoral hemorrhage. *Brain Tumor Pathol*. 2012;29(1):43-46. doi:10.1007/s10014-011-0060-2
70. Oyama H, Kito A, Maki H, Hattori K, Noda T, Wada K. Schwannoma originating from lower cranial nerves: report of 4 cases. *Nagoya J Med Sci*. 2012;74(1-2):199-206. doi:10.18999/nagjms.74.1-2.199

71. Santarius T, Dakoji S, Afshari FT, et al. Isolated hypoglossal schwannoma in a 9-year-old child. *J Neurosurg Pediatr.* 2012;10(2):130-133. doi:10.3171/2012.3.PEDS11555
72. Wan J-H, Wu Y-H, Li Z-J, et al. Triple dumbbell-shaped jugular foramen schwannomas. *J Cranio-Maxillofacial Surg.* 2012;40(4):354-361. doi:10.1016/j.jcms.2011.05.012
73. Zhang Q, Kong F, Guo H, et al. Surgical treatment of dumbbell-shaped hypoglossal schwannoma via a pure endoscopic transoral approach. *Acta Neurochir (Wien).* 2012;154(2):267-275. doi:10.1007/s00701-011-1193-0
74. Baghel P, Gupta A, Tripathi V, Reddy D. Hypoglossal schwannoma presenting as hemi-atrophy of the tongue. *Neurol India.* 2013;61(3):324. doi:10.4103/0028-3886.115092
75. Chowdhury FH, Haque MR, Sarker MH. High cervical spinal schwannoma; microneurosurgical management: an experience of 15 cases. *Acta Neurol Taiwan.* 2013;22(2):59-66. <http://www.ncbi.nlm.nih.gov/pubmed/24030037>
76. Xiao X, Wu Z, Zhang L, et al. Using a modified far-lateral approach to remove hypoglossal neurilemmomas: notes on technique. *J Neurosurg.* 2013;118(3):657-668. doi:10.3171/2012.9.JNS12176
77. Nowak A, Dziedzic T, Czernicki T, Kunert P, Marchel A. Surgical treatment of jugular foramen schwannomas. *Neurol Neurochir Pol.* 2014;48(3):188-195. doi:10.1016/j.pjnns.2014.05.004
78. Suri A, Bansal S, Sharma B, et al. Management of Hypoglossal Schwannomas: Single Institutional Experience of 14 Cases. *J Neurol Surg Part B Skull Base.* 2014;75(03):159-164. doi:10.1055/s-0033-1356924
79. Yu Y, Hu F, Zhang X, Gu Y, Xie T, Ge J. Application of the Hemi-Semi-Laminectomy Approach in the Microsurgical Treatment of C2 Schwannomas. *J*

*Spinal Disord Tech.* 2014;27(6):E199-E204. doi:10.1097/BSD.0b013e318299f606

80. Feldman M, Kimmell KT, Replogle R. Resection of an Occipital-Cervical Junction Schwannoma through a modified minimally invasive approach: Technical Note. *Surg Neurol Int.* 2015;6(5):177. doi:10.4103/2152-7806.156566
81. Hayashi S, Takahashi S, Shidoh S, Yoshida K. Spatial Relationship between Hypoglossal Schwannoma and the Vertebral Artery Using the Far-Lateral Approach. *Neurol Med Chir (Tokyo).* 2015;55(9):744-748. doi:10.2176/nmc.oa.2014-0354
82. Jiang H, He J, Zhan X, He M, Zong S, Xiao Z. Occipito-cervical fusion following gross total resection for the treatment of spinal extramedullary tumors in craniocervical junction: a retrospective case series. *World J Surg Oncol.* 2015;13(1):279. doi:10.1186/s12957-015-0689-0
83. Oichi T, Chikuda H, Morikawa T, et al. Concurrent spinal schwannoma and meningioma mimicking a single cervical dumbbell-shaped tumor: case report. *J Neurosurg Spine.* 2015;23(6):784-787. doi:10.3171/2015.3.SPINE141315
84. Puchalska-Niedbał L, Kulik U, Kojder K, Lubiński W, Rzewuska B, Kojder I. The ophthalmologic signs in case of C1 neurinoma without hydrocephalus – case report. *Pomeranian J Life Sci.* 2016;61(3):278-281. doi:10.21164/pomjlifesci.106
85. Yu Z, Zhao G, Zhao Z, Li Y, Xie G. Giant recurrent dumbbell-shaped hypoglossal schwannoma in an elderly male: A case report. *Oncol Lett.* 2016;11(1):283-286. doi:10.3892/ol.2015.3911
86. Bhatoe H. Excision of hypoglossal neurinoma by condyle sparing suboccipital keyhole approach. *Asian J Neurosurg.* 2017;12(1):120. doi:10.4103/1793-5482.144203
87. Liebelt BD, Haider AS, Steele WJ, Krishna C, Blacklock JB. Spinal Schwannoma and Meningioma Mimicking a Single Mass at the Craniocervical Junction Subsequent to Remote Radiation Therapy for Acne Vulgaris. *World Neurosurg.* 2016;93:484.e13-484.e16. doi:10.1016/j.wneu.2016.07.046

88. Yoon S, Park H, Lee K-S, Park SW, Hong C-K. Single-Stage Operation for Giant Schwannoma at the Craniocervical Junction with Minimal Laminectomy: A Case Report and Literature Review. *Korean J Spine*. 2016;13(3):173. doi:10.14245/kjs.2016.13.3.173
89. Inoue T, Nonaka Y, Hirai H, et al. Single-stage total resection of giant dumbbell-shaped hypoglossal schwannoma: a case report. *Acta Neurochir (Wien)*. 2018;160(4):727-730. doi:10.1007/s00701-017-3431-6
90. Lee SB, Rhim CH, Roh SW, Jeon SR, Rhim SC. Vertebral Artery Injury in C2-3 Epidural Schwannoma Resection: A Case Report and Literature Review. *Korean J Neurotrauma*. 2017;13(1):39. doi:10.13004/kjnt.2017.13.1.39
91. Pisani D, Camenzuli C, Psaila J, Božanić S, Calleja-Agius J. A locally destructive, completely asymptomatic, C1-root schwannoma with base of skull invasion: a case report. *J Surg Case Reports*. 2017;2017(2):1-5. doi:10.1093/jscr/rjx015
92. Goel A, Kaswa A, Shah A, Rai S, Gore S, Dharurkar P. Extraspinal-Interdural Surgical Approach for C2 Neurinomas—Report of an Experience with 50 Cases. *World Neurosurg*. 2018;110:575-582. doi:10.1016/j.wneu.2017.08.191
93. Heda S, Karthik DK, Rao ES, Deshpande A. Hypoglossal canal schwannoma causing isolated left 12th cranial nerve palsy. *BMJ Case Rep*. 2018;2018:bcr-2018-225544. doi:10.1136/bcr-2018-225544
94. Matsuda S, Kajihara Y, Abiko M, et al. Concurrent Schwannoma and Meningioma Arising in the Same Spinal Level: A Report of Two Cases. *NMC Case Rep J*. 2018;5(4):105-109. doi:10.2176/nmccrj.cr.2017-0207
95. Park JM, Kim JH. False localizing sign caused by schwannoma in cervical spinal canal at C1-2 level. *Medicine (Baltimore)*. 2018;97(36):e12215. doi:10.1097/MD.00000000000012215
96. Jung GS, Lee YM, Kim YZ, Kim JS. Intratumoral Hemorrhage of the Cervical Spinal Schwannoma Presenting: Acute Quadriplegia. *Brain Tumor Res*



*Treat.* 2019;7(2):160. doi:10.14791/btrt.2019.7.e34

97. Di Pascuale I, Brito N, Zerpa J, Roa C, Faria G. Hypoglossal Nerve Schwannoma: Case Report and Literature Review. *World Neurosurg.* 2020;135:205-208. doi:10.1016/j.wneu.2019.12.006
98. Nakajima R, Kinoshita M, Yahata T, Nakada M. Recovery time from supplementary motor area syndrome: relationship to postoperative day 7 paralysis and damage of the cingulum. *J Neurosurg.* 2020;132(3):865-874. doi:10.3171/2018.10.JNS182391
99. Aftahy AK, Groll M, Barz M, et al. Surgical Management of Jugular Foramen Schwannomas. *Cancers (Basel).* 2021;13(16):4218. doi:10.3390/cancers13164218
100. Fachniadin A, Widi Nugroho S, Ananda Aman R, et al. A Dumbbell-shaped hypoglossal schwannoma managed by a combination of open surgery and endoscopic assistance. *Interdiscip Neurosurg.* 2021;25:101102. doi:10.1016/j.inat.2021.101102
101. Matsui Y, Fukumura M, Toda M. Cystic Dumbbell-Shaped C1 Schwannoma with Intracranial Extension and Hydrocephalus. *World Neurosurg.* 2021;148:24-28. doi:10.1016/j.wneu.2020.12.173
