# Supplementary material for: Surgical Management of Craniovertebral Junction Schwannomas: A Systematic Review
Source: MDPI journal article supplement (doi:10.3390/curroncol29070384), 2022-07-09
Supplement: s1 [file s1]

**Supplementary File S2.** Risk of bias assessments for included studies.

| <b>Joanna Briggs Institute Checklist for Case Reports – Criteria</b>                    |
|-----------------------------------------------------------------------------------------|
| 1. Were patient’s demographic characteristics clearly described?                        |
| 2. Was the patient’s history clearly described and presented as a timeline?             |
| 3. Was the current clinical condition of the patient on presentation clearly described? |
| 4. Were diagnostic tests or assessment methods and the results clearly described?       |
| 5. Was the intervention(s) or treatment procedure(s) clearly described?                 |
| 6. Was the post-intervention clinical condition clearly described?                      |
| 7. Were adverse events (harms) or unanticipated events identified and described?        |
| 8. Does the case report provide takeaway lessons?                                       |
| <b>Responses Options:</b> Yes, No, Unclear, Not Applicable (NA)                         |
| <b>Quality Rating:</b> Poor 0 – 2; Fair 3 – 5; Good 6 – 8                               |

[illegible]

|                                               |     |     |     |     |     |     |     |     |          |
|-----------------------------------------------|-----|-----|-----|-----|-----|-----|-----|-----|----------|
| Mariniello et al. – 2000 <sup>33</sup>        | Yes | 8 – Good |
| Passacantilli et al. – 2003 <sup>36</sup>     | Yes | No  | 7 – Good |
| Tatebayashi et al. – 2003 <sup>37</sup>       | Yes | 8 – Good |
| Aihara et al. – 2004 <sup>38</sup>            | Yes | 8 – Good |
| Ho et al. – 2004 <sup>39</sup>                | Yes | 8 – Good |
| Kim et al. – 2005 <sup>41</sup>               | Yes | Yes | Yes | Yes | Yes | No  | No  | Yes | 6 – Good |
| Takumi et al. – 2005 <sup>42</sup>            | Yes | 8 – Good |
| Sato et al. – 2006 <sup>43</sup>              | Yes | 8 – Good |
| Kikkawa et al. – 2007 <sup>45</sup>           | Yes | Yes | Yes | Yes | Yes | No  | No  | Yes | 6 – Good |
| Kim et al. – 2007 <sup>46</sup>               | Yes | 8 – Good |
| Tucker et al. – 2007 <sup>47</sup>            | Yes | 8 – Good |
| Ciappetta et al. – 2008 <sup>48</sup>         | Yes | 8 – Good |
| Garg et al. – 2008 <sup>49</sup>              | Yes | 8 – Good |
| Kuo et al. – 2008 <sup>50</sup>               | Yes | 8 – Good |
| Heiroth et al. – 2009 <sup>52</sup>           | Yes | 8 – Good |
| Edizer et al. – 2010 <sup>56</sup>            | Yes | Yes | Yes | Yes | Yes | No  | No  | Yes | 6 – Good |
| Ishikawa et al. – 2010 <sup>57</sup>          | Yes | 8 – Good |
| Ji et al. – 2010 <sup>58</sup>                | Yes | Yes | Yes | Yes | Yes | No  | No  | Yes | 6 – Good |
| Li et al. – 2010 <sup>59</sup>                | Yes | 8 – Good |
| Gopalakrishnamet al. – 2011 <sup>62</sup>     | Yes | Yes | Yes | Yes | Yes | No  | No  | Yes | 6 – Good |
| Ramzan et al. – 2011 <sup>63</sup>            | Yes | Yes | Yes | Yes | Yes | No  | No  | Yes | 6 – Good |
| Helms et al. – 2012 <sup>67</sup>             | Yes | 8 – Good |
| Nakamizo et al. – 2012 <sup>68</sup>          | Yes | Yes | Yes | Yes | Yes | No  | No  | Yes | 6 – Good |
| Ohba et al. – 2012 <sup>69</sup>              | Yes | 8 – Good |
| Oyama et al. – 2012 <sup>70</sup>             | Yes | 8 – Good |
| Santarius et al. – 2012 <sup>71</sup>         | Yes | 8 – Good |
| Baghel et al. – 2013 <sup>74</sup>            | Yes | Yes | Yes | Yes | Yes | No  | No  | Yes | 6 – Good |
| Feldman et al. – 2015 <sup>80</sup>           | Yes | 8 – Good |
| Oichi et al. – 2015 <sup>83</sup>             | Yes | 8 – Good |
| Puchalska-Niedbał et al. – 2015 <sup>84</sup> | Yes | 8 – Good |
| Yu et al. – 2015 <sup>85</sup>                | Yes | 8 – Good |
| Bhatoe et al. – 2016 <sup>86</sup>            | Yes | 8 – Good |
| Liebelt et al. – 2016 <sup>87</sup>           | Yes | Yes | Yes | Yes | Yes | No  | No  | Yes | 6 – Good |
| Yoon et al. – 2016 <sup>88</sup>              | Yes | Yes | Yes | Yes | Yes | No  | No  | Yes | 6 – Good |
| Inoue et al. – 2017 <sup>89</sup>             | Yes | 8 – Good |
| Lee et al. – 2017 <sup>90</sup>               | Yes | 8 – Good |
| Pisani et al. – 2017 <sup>91</sup>            | Yes | 8 – Good |
| Heda et al. – 2018 <sup>93</sup>              | Yes | Yes | Yes | Yes | Yes | Yes | No  | Yes | 7 – Good |
| Park et al. – 2018 <sup>95</sup>              | Yes | 8 – Good |
| Jung et al. – 2019 <sup>96</sup>              | Yes | 8 – Good |
| Di Pascuale et al. – 2020 <sup>97</sup>       | Yes | 8 – Good |
| Nakajima et al. – 2020 <sup>98</sup>          | Yes | 8 – Good |
| Fachniadin et al. – 2021 <sup>100</sup>       | Yes | 8 – Good |
| Matsui et al. – 2021 <sup>101</sup>           | Yes | 8 – Good |

References correspond to Supplementary File S1.

| <b>Joanna Briggs Institute Checklist for Case Series – Criteria</b>                                              |
|------------------------------------------------------------------------------------------------------------------|
| 1. Were there clear criteria for inclusion in the case series?                                                   |
| 2. Was the condition measured in a standard, reliable way for all participants included in the case series?      |
| 3. Were valid methods used for identification of the condition for all participants included in the case series? |
| 4. Did the case series have consecutive inclusion of participants?                                               |
| 5. Did the case series have complete inclusion of participants?                                                  |
| 6. Was there clear reporting of the demographics of the participants in the study?                               |
| 7. Was there clear reporting of clinical information of the participants?                                        |
| 8. Were the outcomes or follow up results of cases clearly reported?                                             |
| 9. Was there clear reporting of the presenting site(s)/clinic(s) demographic information?                        |
| 10. Was statistical analysis appropriate?                                                                        |
| <b>Responses Options:</b> Yes, No, Unclear, Not Applicable (NA)                                                  |
| <b>Quality Rating:</b> Poor 0 – 3; Fair 4 – 7; Good 8 – 10                                                       |

| <b>Study (Case Series)</b>             | <b>1</b> | <b>2</b> | <b>3</b> | <b>4</b> | <b>5</b> | <b>6</b> | <b>7</b> | <b>8</b> | <b>9</b> | <b>10</b> | <b>Rating</b> |
|----------------------------------------|----------|----------|----------|----------|----------|----------|----------|----------|----------|-----------|---------------|
| Hakuba et al. – 1984 <sup>11</sup>     | Yes      | No       | NA        | 8 – Good      |
| Tuck et al. – 1984 <sup>12</sup>       | Yes      | No       | NA        | 8 – Good      |
| Crockard et al. – 1991 <sup>18</sup>   | Yes      | No       | NA        | 8 – Good      |
| Kratimenos et al. – 1993 <sup>19</sup> | Yes      | No       | NA        | 8 – Good      |
| Kamitani et al. – 1994 <sup>21</sup>   | Yes      | No       | NA        | 8 – Good      |
| Hoshi et al. – 2000 <sup>31</sup>      | Yes      | No       | NA        | 8 – Good      |
| Kyoshima et al. – 2003 <sup>34</sup>   | Yes      | No       | NA        | 8 – Good      |
| Leal Filho et al. – 2003 <sup>35</sup> | Yes      | No       | NA        | 8 – Good      |
| Kadri et al. – 2004 <sup>40</sup>      | Yes      | No       | NA        | 8 – Good      |
| Ueda et al. – 2006 <sup>44</sup>       | Yes      | No       | Yes       | 9 – Good      |
| Chibbaro et al. – 2009 <sup>51</sup>   | Yes      | No       | NA        | 8 – Good      |
| Ichimura et al. – 2009 <sup>53</sup>   | Yes      | NA        | 9 – Good      |
| Mathisien et al. – 2009 <sup>54</sup>  | Yes      | No       | NA        | 8 – Good      |
| Watanabe et al. – 2009 <sup>55</sup>   | Yes      | NA        | 9 – Good      |
| Cavalcanti et al. – 2010 <sup>60</sup> | Yes      | NA        | 9 – Good      |
| Takami et al. – 2010 <sup>61</sup>     | Yes      | No       | NA        | 8 – Good      |
| Nonaka et al. – 2011 <sup>64</sup>     | Yes      | No       | NA        | 8 – Good      |
| Wang et al. – 2011 <sup>65</sup>       | Yes      | NA        | 8 – Good      |
| Zhang et al. – 2011 <sup>66</sup>      | Yes      | No       | NA        | 8 – Good      |
| Wan et al. – 2012 <sup>72</sup>        | Yes      | No       | NA        | 8 – Good      |
| Zhang et al. – 2012 <sup>100</sup>     | Yes      | No       | NA        | 8 – Good      |
| Chowdhury et al. – 2013 <sup>75</sup>  | Yes      | NA        | 9 – Good      |
| Xiao et al. – 2013 <sup>76</sup>       | Yes      | NA        | 9 – Good      |
| Nowak et al. – 2014 <sup>77</sup>      | Yes      | No       | NA        | 8 – Good      |

|                                     |     |     |     |     |     |     |     |     |     |     |          |
|-------------------------------------|-----|-----|-----|-----|-----|-----|-----|-----|-----|-----|----------|
| Suri et al. – 2014 <sup>78</sup>    | Yes | No  | NA  | 8 – Good |
| Yu et al. – 2014 <sup>79</sup>      | Yes | No  | NA  | 8 – Good |
| Hayashi et al. – 2015 <sup>81</sup> | Yes | NA  | 7 – Good |
| Jiang et al. – 2015 <sup>82</sup>   | Yes | 8 – Good |
| Goel et al. – 2018 <sup>92</sup>    | Yes | No  | NA  | 8 – Good |
| Matsuda et al. – 2018 <sup>94</sup> | Yes | No  | NA  | 8 – Good |
| Aftahy et al. – 2021 <sup>99</sup>  | Yes | No  | NA  | 8 – Good |

References correspond to Supplementary File S1.
